# Supplementary material for: Theoretical insights into selective extraction of Am(iii) from Cm(iii) and Eu(iii) with asymmetric N-heterocyclic ligands
Source: Royal Society of Chemistry journal article supplement (doi:10.1039/d3dt03965j), 2024-01-01
Supplement: d3dt03965j1.pdf [file d3dt03965j1.pdf]

## Electronic Supplementary Information (ESI)

### Theoretical Insights into Selective Extraction of Am(III) from Cm(III) and Eu(III) with Asymmetric N-heterocyclic Ligands

*Yan-Mei Chen,<sup>a</sup> Cong-Zhi Wang,<sup>\*b</sup> Lei Zhang,<sup>a</sup> Qun-Yan Wu,<sup>b</sup> Jian-Hui Lan,<sup>b</sup> Zhi-Fang Chai,<sup>a,b</sup> and Wei-Qun Shi<sup>\*b</sup>*

<sup>a</sup>Engineering Laboratory of Advanced Energy Materials, Ningbo Institute of Materials  
Technology and Engineering, Chinese Academy of Sciences, Ningbo, Zhejiang,  
315201, China

<sup>b</sup>Laboratory of Nuclear Energy Chemistry, Institute of High Energy Physics, Chinese  
Academy of Sciences, Beijing 100049, China

\*Email: shiwq@ihep.ac.cn; wangcongzhi@ihep.ac.cn

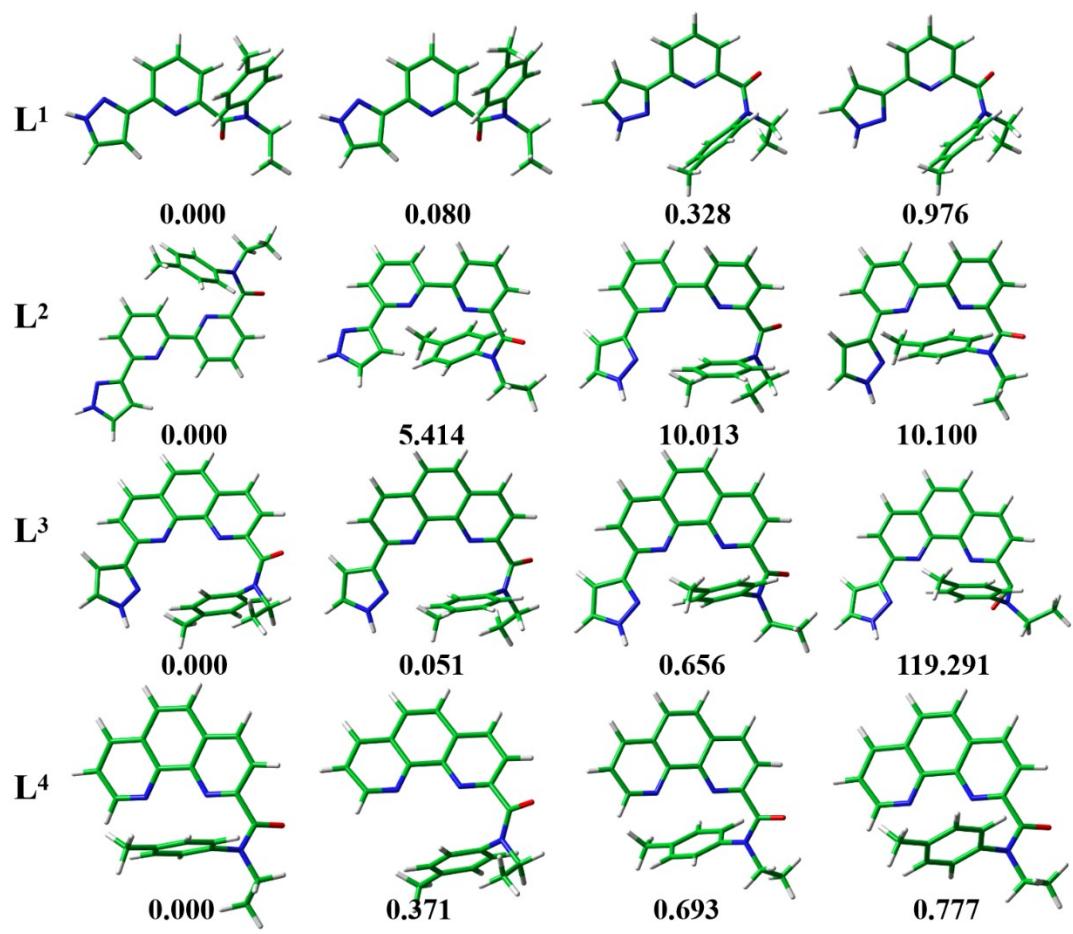

**Figure S1.** Optimized structures and relative energies of the isomers for L<sup>1</sup>-L<sup>4</sup> ligands.

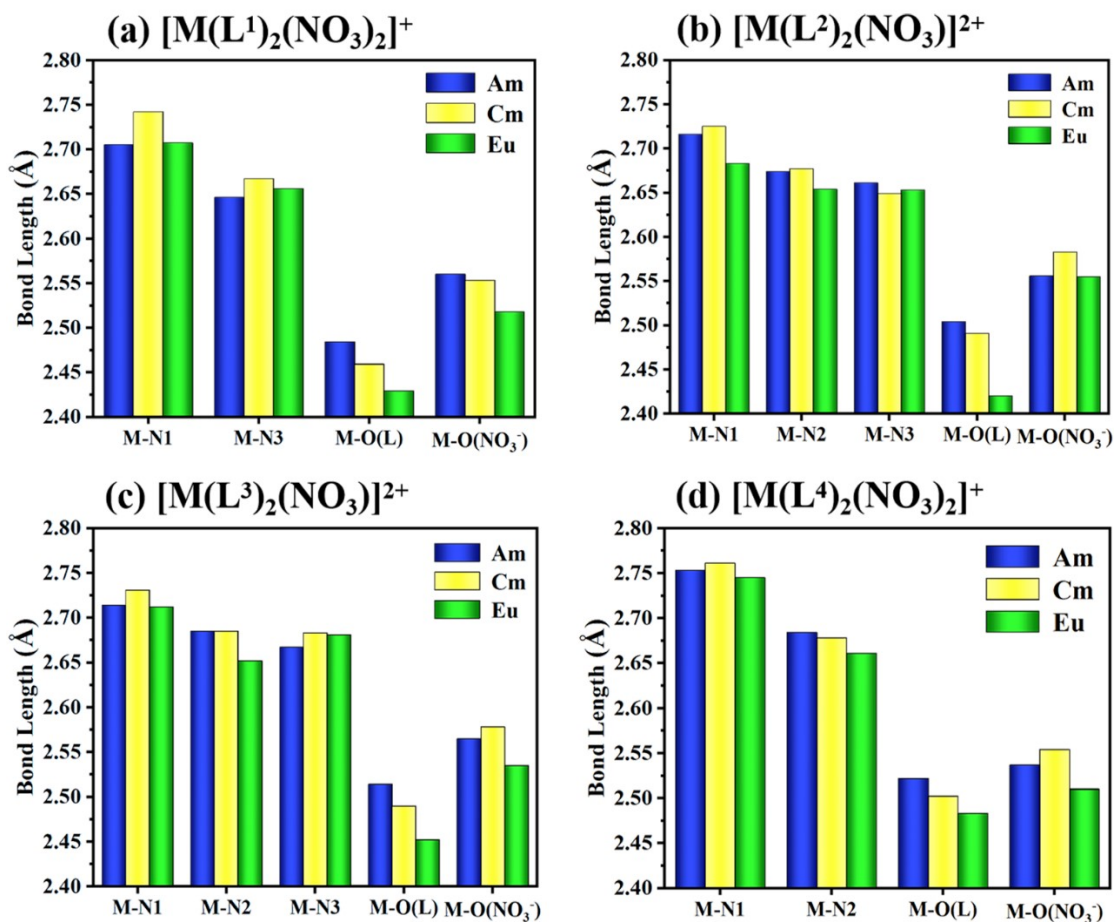

**Figure S2.** M–N and M–O bond lengths (Å) in 1:2 type complexes at the B3LYP/6-311G(d,p)/RECP level of theory.

**Table S1.** Average M–N and M–O bond lengths (Å) in the 1:1 and 1:2 type complexes with L<sup>1</sup>–L<sup>4</sup> ligands at the B3LYP/6-311G(d,p)/RECP level of theory in the gas phase<sup>a</sup>.

| Species                                                                          | Bond Distances |                   |                   |                   |                   |                                    |
|----------------------------------------------------------------------------------|----------------|-------------------|-------------------|-------------------|-------------------|------------------------------------|
|                                                                                  | CN             | M-N1              | M-N2              | M-N3              | M-O               | M-O(NO <sub>3</sub> <sup>-</sup> ) |
| ML <sup>1</sup> (NO <sub>3</sub> ) <sub>3</sub>                                  | 9              | 2.682/2.672/2.641 | /                 | 2.575/2.553/2.531 | 2.520/2.530/2.489 | 2.507/2.505/2.470                  |
| ML <sup>2</sup> (NO <sub>3</sub> ) <sub>3</sub>                                  | 10             | 2.786/2.821/2.790 | 2.715/2.728/2.701 | 2.566/2.577/2.551 | 2.509/2.507/2.475 | 2.545/2.537/2.505                  |
| ML <sup>3</sup> (NO <sub>3</sub> ) <sub>3</sub>                                  | 10             | 2.766/2.806/2.774 | 2.696/2.714/2.687 | 2.598/2.597/2.572 | 2.554/2.524/2.495 | 2.536/2.536/2.504                  |
| ML <sup>4</sup> (NO <sub>3</sub> ) <sub>3</sub>                                  | 9              | 2.645/2.678/2.651 | 2.633/2.659/2.620 | /                 | 2.528/2.520/2.493 | 2.513/2.501/2.468                  |
| [M(L <sup>1</sup> ) <sub>2</sub> (NO <sub>3</sub> ) <sub>2</sub> ] <sup>+</sup>  | 10             | 2.705/2.742/2.707 | /                 | 2.646/2.667/2.656 | 2.484/2.459/2.429 | 2.560/2.553/2.518                  |
| [M(L <sup>2</sup> ) <sub>2</sub> (NO <sub>3</sub> ) <sub>2</sub> ] <sup>2+</sup> | 10             | 2.716/2.725/2.683 | 2.674/2.677/2.654 | 2.661/2.649/2.653 | 2.504/2.491/2.420 | 2.556/2.583/2.555                  |
| [M(L <sup>3</sup> ) <sub>2</sub> (NO <sub>3</sub> ) <sub>2</sub> ] <sup>2+</sup> | 10             | 2.714/2.731/2.712 | 2.685/2.685/2.652 | 2.667/2.683/2.681 | 2.514/2.490/2.452 | 2.565/2.578/2.535                  |
| [M(L <sup>4</sup> ) <sub>2</sub> (NO <sub>3</sub> ) <sub>2</sub> ] <sup>+</sup>  | 10             | 2.753/2.761/2.745 | 2.684/2.678/2.661 | /                 | 2.522/2.502/2.483 | 2.537/2.554/2.510                  |

<sup>a</sup>.../.../... represents the results obtained for the Am(III)/Cm(III)/Eu(III) complexes, respectively.

**Table S2.** Calculated average Wiberg bond indices of M–N and M–O bond in complexes with L<sup>1</sup>–L<sup>4</sup> ligands at the B3LYP/6-311G(d,p)/RECP level of theory in the gas phase<sup>a</sup>.

| Species                                                                          | M-N1              | M-N2              | M-N3              | M-O               | M-O(NO <sub>3</sub> <sup>-</sup> ) |
|----------------------------------------------------------------------------------|-------------------|-------------------|-------------------|-------------------|------------------------------------|
| ML <sup>1</sup> (NO <sub>3</sub> ) <sub>3</sub>                                  | 0.418/0.415/0.376 | /                 | 0.514/0.525/0.481 | 0.536/0.516/0.464 | 0.602/0.590/0.524                  |
| ML <sup>2</sup> (NO <sub>3</sub> ) <sub>3</sub>                                  | 0.366/0.335/0.308 | 0.393/0.381/0.343 | 0.531/0.512/0.469 | 0.532/0.524/0.461 | 0.557/0.553/0.486                  |
| ML <sup>3</sup> (NO <sub>3</sub> ) <sub>3</sub>                                  | 0.375/0.339/0.313 | 0.407/0.387/0.348 | 0.504/0.498/0.455 | 0.491/0.511/0.446 | 0.565/0.553/0.488                  |
| ML <sup>4</sup> (NO <sub>3</sub> ) <sub>3</sub>                                  | 0.458/0.428/0.394 | 0.444/0.416/0.388 | /                 | 0.521/0.517/0.447 | 0.598/0.598/0.526                  |
| [M(L <sup>1</sup> ) <sub>2</sub> (NO <sub>3</sub> ) <sub>2</sub> ] <sup>+</sup>  | 0.415/0.376/0.351 | /                 | 0.478/0.456/0.400 | 0.569/0.588/0.522 | 0.542/0.537/0.476                  |
| [M(L <sup>2</sup> ) <sub>2</sub> (NO <sub>3</sub> ) <sub>2</sub> ] <sup>2+</sup> | 0.419/0.404/0.377 | 0.436/0.426/0.386 | 0.474/0.476/0.408 | 0.560/0.563/0.535 | 0.545/0.509/0.452                  |
| [M(L <sup>3</sup> ) <sub>2</sub> (NO <sub>3</sub> ) <sub>2</sub> ] <sup>2+</sup> | 0.424/0.407/0.365 | 0.427/0.419/0.387 | 0.478/0.459/0.402 | 0.552/0.569/0.510 | 0.535/0.512/0.468                  |
| [M(L <sup>4</sup> ) <sub>2</sub> (NO <sub>3</sub> ) <sub>2</sub> ] <sup>+</sup>  | 0.396/0.386/0.347 | 0.418/0.416/0.373 | /                 | 0.531/0.542/0.465 | 0.566/0.535/0.490                  |

<sup>a</sup>.../.../... represents the results obtained for the Am(III)/Cm(III)/Eu(III) complexes, respectively.

**Table S3.** Calculated properties (au) at BCPs of M–N and M–O bonds for the 1:2 type complexes at the B3LYP/6-311G(d,p)/RECP level of theory <sup>a</sup>.

| Species                                                                          | Bonds                              | $\rho$            | $\nabla^2\rho$    | $H \times 10^{-4}$ |
|----------------------------------------------------------------------------------|------------------------------------|-------------------|-------------------|--------------------|
| [M(L <sup>1</sup> ) <sub>2</sub> (NO <sub>3</sub> ) <sub>2</sub> ] <sup>+</sup>  | M-N1                               | 0.035/0.032/0.030 | 0.114/0.106/0.103 | -4.5/-2.4/12.3     |
|                                                                                  | M-N3                               | 0.038/0.036/0.032 | 0.134/0.126/0.120 | -6.7/-3.6/16.0     |
|                                                                                  | M-O <sub>L</sub>                   | 0.046/0.048/0.045 | 0.199/0.206/0.199 | -2.8/-1.2/17.2     |
|                                                                                  | M-O(NO <sub>3</sub> <sup>-</sup> ) | 0.042/0.042/0.041 | 0.161/0.161/0.156 | -8.3/-7.3/7.8      |
| [M(L <sup>2</sup> ) <sub>2</sub> (NO <sub>3</sub> ) <sub>2</sub> ] <sup>2+</sup> | M-N1                               | 0.034/0.033/0.032 | 0.110/0.108/0.109 | -6.4/-5.4/10.3     |
|                                                                                  | M-N2                               | 0.038/0.037/0.034 | 0.124/0.122/0.116 | -12.5/-11.3/7.7    |
|                                                                                  | M-N3                               | 0.037/0.038/0.033 | 0.129/0.129/0.119 | -8.3/-7.5/14.1     |
|                                                                                  | M-O <sub>L</sub>                   | 0.045/0.045/0.047 | 0.184/0.189/0.203 | -1.6/-1.1/11.5     |
|                                                                                  | M-O(NO <sub>3</sub> <sup>-</sup> ) | 0.043/0.040/0.037 | 0.158/0.150/0.140 | -9.2/-7.7/10.3     |
| [M(L <sup>3</sup> ) <sub>2</sub> (NO <sub>3</sub> ) <sub>2</sub> ] <sup>2+</sup> | M-N1                               | 0.035/0.034/0.031 | 0.113/0.108/0.104 | -10.4/-8.1/9.0     |
|                                                                                  | M-N2                               | 0.037/0.037/0.035 | 0.122/0.121/0.117 | -14.0/-13.3/4.5    |
|                                                                                  | M-N3                               | 0.037/0.035/0.031 | 0.127/0.122/0.113 | -6.1/-4.1/14.5     |
|                                                                                  | M-O <sub>L</sub>                   | 0.044/0.046/0.044 | 0.182/0.190/0.186 | -1.8/-1.4/15.6     |
|                                                                                  | M-O(NO <sub>3</sub> <sup>-</sup> ) | 0.042/0.040/0.039 | 0.156/0.151/0.149 | -8.1/-7.1/8.2      |
| [M(L <sup>4</sup> ) <sub>2</sub> (NO <sub>3</sub> ) <sub>2</sub> ] <sup>+</sup>  | M-N1                               | 0.032/0.031/0.028 | 0.104/0.100/0.095 | -3.1/-1.8/14.1     |
|                                                                                  | M-N2                               | 0.037/0.037/0.034 | 0.123/0.122/0.117 | -10.7/-9.9/9.6     |
|                                                                                  | M-O <sub>L</sub>                   | 0.042/0.044/0.040 | 0.177/0.182/0.172 | 2.1/2.2/21.4       |
|                                                                                  | M-O(NO <sub>3</sub> <sup>-</sup> ) | 0.045/0.043/0.041 | 0.167/0.160/0.157 | -11.2/-9.4/5.4     |

<sup>a</sup>.../.../... represents the results obtained for the Am(III)/Cm(III)/Eu(III) complexes, respectively.

**Table S4.** Changes of Gibbs free energy ( $\Delta G$ , kcal/mol) and their Am/Cm and Am/Eu differences ( $\Delta\Delta G$ , kcal/mol) for complexation reactions of 1:1 and 1:2 type species in nitrobenzene at the B3LYP/6-311G(d,p)/RECP level of theory <sup>a</sup>.

| Reactions                                                                                                                                                                                                           | $\Delta G$           | $\Delta\Delta G_{\text{Am/Cm}}/\Delta\Delta G_{\text{Am/Eu}}$ |
|---------------------------------------------------------------------------------------------------------------------------------------------------------------------------------------------------------------------|----------------------|---------------------------------------------------------------|
| $[\text{M}(\text{H}_2\text{O})_9]^{3+}_{\text{aq}} + \text{L}^1_{\text{org}} + 3\text{NO}_3^-_{\text{aq}} \rightarrow \text{ML}^1(\text{NO}_3)_{3\text{org}} + 9\text{H}_2\text{O}_{\text{aq}}$                     | -51.95/-51.89/-49.16 | -0.06/-2.79                                                   |
| $[\text{M}(\text{H}_2\text{O})_9]^{3+}_{\text{aq}} + \text{L}^2_{\text{org}} + 3\text{NO}_3^-_{\text{aq}} \rightarrow \text{ML}^2(\text{NO}_3)_{3\text{org}} + 9\text{H}_2\text{O}_{\text{aq}}$                     | -61.09/-56.45/-55.88 | -4.64/-5.21                                                   |
| $[\text{M}(\text{H}_2\text{O})_9]^{3+}_{\text{aq}} + \text{L}^3_{\text{org}} + 3\text{NO}_3^-_{\text{aq}} \rightarrow \text{ML}^3(\text{NO}_3)_{3\text{org}} + 9\text{H}_2\text{O}_{\text{aq}}$                     | -65.04/-64.42/-61.92 | -0.62/-3.12                                                   |
| $[\text{M}(\text{H}_2\text{O})_9]^{3+}_{\text{aq}} + \text{L}^4_{\text{org}} + 3\text{NO}_3^-_{\text{aq}} \rightarrow \text{ML}^4(\text{NO}_3)_{3\text{org}} + 9\text{H}_2\text{O}_{\text{aq}}$                     | -54.00/-52.36/-50.90 | -1.64/-3.10                                                   |
| $[\text{M}(\text{H}_2\text{O})_9]^{3+}_{\text{aq}} + 2\text{L}^1_{\text{org}} + 2\text{NO}_3^-_{\text{aq}} \rightarrow [\text{M}(\text{L}^1)_2(\text{NO}_3)_2]^{2+}_{\text{org}} + 9\text{H}_2\text{O}_{\text{aq}}$ | -51.08/-48.73/-46.67 | -2.35/-4.41                                                   |
| $[\text{M}(\text{H}_2\text{O})_9]^{3+}_{\text{aq}} + 2\text{L}^2_{\text{org}} + \text{NO}_3^-_{\text{aq}} \rightarrow [\text{M}(\text{L}^2)_2(\text{NO}_3)]^{2+}_{\text{org}} + 9\text{H}_2\text{O}_{\text{aq}}$    | -41.43/-38.92/-40.21 | -2.51/-1.22                                                   |
| $[\text{M}(\text{H}_2\text{O})_9]^{3+}_{\text{aq}} + 2\text{L}^3_{\text{org}} + \text{NO}_3^-_{\text{aq}} \rightarrow [\text{M}(\text{L}^3)_2(\text{NO}_3)]^{2+}_{\text{org}} + 9\text{H}_2\text{O}_{\text{aq}}$    | -52.51/-50.74/-50.69 | -1.77/-1.82                                                   |
| $[\text{M}(\text{H}_2\text{O})_9]^{3+}_{\text{aq}} + 2\text{L}^4_{\text{org}} + 2\text{NO}_3^-_{\text{aq}} \rightarrow [\text{M}(\text{L}^4)_2(\text{NO}_3)_2]^{2+}_{\text{org}} + 9\text{H}_2\text{O}_{\text{aq}}$ | -51.74/-48.59/-48.94 | -3.15/-2.80                                                   |

<sup>a</sup>.../.../... represents the results obtained for the Am(III)/Cm(III)/Eu(III) complexes, respectively.
